# Supplementary material for: Co-translational protein targeting facilitates centrosomal recruitment of PCNT during centrosome maturation in vertebrates
Source: eLife journal article supplement (doi:10.7554/elife.34959), 2018-04-30
Supplement: supp [file elife-34959-supp-v1.zip]

Archive with 23 entries (23 files):
- elife_poa_e34959_Figure_2_source_data_1.xlsx
- elife_poa_e34959_Figure_3_source_data_1.xlsx
- elife_poa_e34959_Figure_4_figure_supplement_3.pdf
- elife_poa_e34959_Figure_4_figure_supplement_3_source_data_1.xlsx
- elife_poa_e34959_Figure_3_figure_supplement_2_source_data_1.xlsx
- elife_poa_e34959_Figure_3_figure_supplement_1.pdf
- elife_poa_e34959_Figure_1_figure_supplement_1.pdf
- elife_poa_e34959_Figure_4_figure_supplement_2.pdf
- elife_poa_e34959_Supplementary_File_3.docx
- elife_poa_e34959_Figure_4_source_data_1.xlsx
- elife_poa_e34959_Figure_3_figure_supplement_2.pdf
- elife_poa_e34959_Figure_6_figure_supplement_1_source_data_1.xlsx
- elife_poa_e34959_Supplementary_File_2.docx
- elife_poa_e34959_Figure_4_figure_supplement_2_source_data_1.xlsx
- elife_poa_e34959_Figure_4_figure_supplement_1.pdf
- elife_poa_e34959_Supplementary_File_1.xlsx
- elife_poa_e34959_Figure_5_source_data_1.xlsx
- elife_poa_e34959_Figure_3_figure_supplement_3.pdf
- elife_poa_e34959_Figure_2_figure_supplement_1.pdf
- elife_poa_e34959_Figure_6_figure_supplement_1.pdf
- elife_poa_e34959_Transparent_Reporting_File.docx
- elife_poa_e34959_Figure_6_source_data_1.xlsx
- elife_poa_e34959_Figure_2_figure_supplement_2.pdf
