# Supplementary material for: Co-translational protein targeting facilitates centrosomal recruitment of PCNT during centrosome maturation in vertebrates
Source: eLife journal article supplement (doi:10.7554/elife.34959), 2018-04-30
Supplement: supp [file elife-34959-supp-v1.zip › elife_poa_e34959_Figure_2_source_data_1.xlsx]

## Sheet: graphs
exp 1
Stage in cell cycle	colocalized	total	percent
Interphase n=120	6	120	5
prophase n=35	32	35	91.4286
prometaphase n=30	29	30	96.6667
metaphase n=37	21	37	56.7568
anaphase n=34	7	34	20.5882
telophase n=31	8	31	25.8065
exp 2
Stage in cell cycle	colocalized	total	percent
Interphase n=15	2	15	13.3333
prophase n=35	33	35	94.2857
prometaphase n=42	38	42	90.4762
metaphase n=33	15	33	45.4545
anaphase n=32	3	32	9.375
telophase n=39	6	39	15.3846
exp 3
Stage in cell cycle	colocalized	total	percent
Interphase n=3	0	3	0
prophase n=31	31	31	100
prometaphase n=30	28	30	93.3333
metaphase n=32	17	32	53.125
anaphase n=35	3	35	8.57143
telophase n=31	3	31	9.67742
average
Stage in cell cycle	average percent	stddev
Interphase n=138	6.11111	6.73575
prophase n=101	95.2381	4.36436
prometaphase n=102	93.4921	3.09829
metaphase n=102	51.7788	5.77012
anaphase n=101	12.8449	6.71796
telophase n=101	16.9562	8.17855
