# Supplementary material for: Co-translational protein targeting facilitates centrosomal recruitment of PCNT during centrosome maturation in vertebrates
Source: eLife journal article supplement (doi:10.7554/elife.34959), 2018-04-30
Supplement: supp [file elife-34959-supp-v1.zip › elife_poa_e34959_Figure_3_figure_supplement_2_source_data_1.xlsx]

## Sheet: Sheet1
Radius of mitotic centrosome (µm)
1.03209
1.12127
1.0238
1.08532
0.914173
0.909868
1.10326
1.01731
1.03432
1.18129
1.13933
1.09701
1.05
1.30989
1.12348
1.21266
1.03209
1.23862
1.10522
1.47324
1.26278
1.21724
1.23288
0.9287
1.2
1.19314
1.09834
0.969759
1.05474
1.10717
1.38524
1.34158
1.12568
1.26303
1.04061
1.13564
1.04971
0.969759
1.03803
1.26576
0.945464
0.951654
1.0706
0.992491
1.19118
1.08936
1.03134
1.23524
