# Supplementary material for: Co-translational protein targeting facilitates centrosomal recruitment of PCNT during centrosome maturation in vertebrates
Source: eLife journal article supplement (doi:10.7554/elife.34959), 2018-04-30
Supplement: supp [file elife-34959-supp-v1.zip › elife_poa_e34959_Figure_3_source_data_1.xlsx]

## Sheet: Sheet1
Fraction of PCNT mRNA with anti-PCNT-N-term signals in each cell	Control	Puromycin
	0.03	0.07
	0.06	0.03
	0.11	0.04
	0.06	0.02
	0.01	0.02
	0	0.06
	0.11	0.07
	0.06	0.09
	0.03	0.08
	0.09	0.13
	0.05	0.3
	0.1	0
	0.18	0
	0.18	0
	0.06	0.03
	0.15	0.09
	0.09	0
	0.15	0.09
	0.04	0.11
	0.33	0.02
	0.03	0.02
	0.04	0
	0.14	0.12
	0	0.03
	0.19	0.13
	0.24	0
	0.14	0
	0.09	0.03
	0.12	0.05
	0.11	0.16
	0.09	0
	0.1	0
	0.09	0.01
	0.1	0
	0.22	0.02
	0.1	0.12
	0.08	0.07
	0.18	0.02
	0.25	0.05
	0.13	0.02
	0.05	0.03
	0.15	0.08
	0.08	0.04
	0.08	0.02
	0.19	0.16
	0.19	0.01
	0.05	0.01
	0.03	0
		0
		0.04
		0.03
