# Supplementary material for: Co-translational protein targeting facilitates centrosomal recruitment of PCNT during centrosome maturation in vertebrates
Source: eLife journal article supplement (doi:10.7554/elife.34959), 2018-04-30
Supplement: supp [file elife-34959-supp-v1.zip › elife_poa_e34959_Figure_4_figure_supplement_2_source_data_1.xlsx]

## Sheet: Sheet1
	% of cells with more PCNT mRNA at the larger centrosome
experiment 1	60.6061
experiment 2	58.3333
experiment 3	85.7143
experiment 4	61.5385
Total number of cells analzyed: 78
