# Supplementary material for: Co-translational protein targeting facilitates centrosomal recruitment of PCNT during centrosome maturation in vertebrates
Source: eLife journal article supplement (doi:10.7554/elife.34959), 2018-04-30
Supplement: supp [file elife-34959-supp-v1.zip › elife_poa_e34959_Figure_4_figure_supplement_3_source_data_1.xlsx]

## Sheet: RNA distribution
RNA distribution	Control			Nocodazole
Distance (µm)	Mean	SD	Number of centrosomes	Mean	SD	Number of centrosomes
0.5	0.0243109	0.0427685	98	0.00039974	0.00370704	86
1	0.169061	0.133043	98	0.0106729	0.0300026	86
1.5	0.0497039	0.0568413	98	0.0186472	0.0481381	86
2	0.035897	0.0453153	98	0.0128507	0.0293283	86
2.5	0.0266989	0.0342661	98	0.0239628	0.042337	86
3	0.0287967	0.0358535	98	0.054737	0.124916	86
3.5	0.0297482	0.0383439	98	0.0395055	0.051594	86
4	0.0432745	0.054173	98	0.0389366	0.0601155	86
4.5	0.0464261	0.0524044	98	0.0796952	0.0770883	86
5	0.0483221	0.0530337	98	0.0505098	0.0795927	86
5.5	0.0426818	0.0447617	98	0.0463167	0.0564599	86
6	0.051244	0.0589838	98	0.0473189	0.0585392	86
6.5	0.0545023	0.0534805	98	0.0648421	0.0837572	86
7	0.051298	0.049021	98	0.0523879	0.0687008	86
7.5	0.0393328	0.0470903	98	0.0456497	0.0698954	86
8	0.0383642	0.0434331	98	0.0421723	0.0596843	86
8.5	0.0363317	0.0491289	98	0.0323117	0.0448598	86
9	0.0279724	0.0374077	98	0.0438028	0.0589743	86
9.5	0.0216678	0.0300377	98	0.0385622	0.0681491	86
10	0.0172839	0.0283685	98	0.0431344	0.062311	86
10.5	0.0170551	0.0268646	98	0.0288049	0.0476116	86
11	0.0173427	0.0297688	98	0.0247728	0.0463474	86
11.5	0.0155108	0.0307364	98	0.0228754	0.0433883	86
12	0.0135197	0.0305777	98	0.0164985	0.0408454	86
12.5	0.0119917	0.028897	98	0.0112348	0.0224117	86
13	0.00581447	0.0218785	98	0.0161233	0.0353811	86
13.5	0.00660775	0.0181012	98	0.0119201	0.0342678	86
14	0.00454328	0.0134067	98	0.0154442	0.0442815	86
14.5	0.0016622	0.00755319	98	0.00799587	0.0247263	86
15	0.00579675	0.0229273	98	0.0101321	0.0359674	86
15.5	0.00317831	0.0120156	98	0.00543985	0.0208987	86
16	0.00236304	0.0100195	98	0.0050892	0.0179791	86
16.5	0.00165029	0.00804079	98	0.00960944	0.0249219	86
17	0.00236059	0.00880785	98	0.00468013	0.0175005	86
17.5	0.00431634	0.0283312	98	0.00301781	0.0115906	86
18	0.00088061	0.00582013	98	0.0084573	0.0302227	86
18.5	0.00072618	0.00425445	98	0.00462	0.0204375	86
19	0.00018772	0.00185834	98	0.0022556	0.0119845	86
19.5	0.00096322	0.00707352	98	0.0003061	0.00206882	86
20	0.00061082	0.0045292	98	0.00430655	0.0219666	86

## Sheet: Protein distribution
Protein distribution	Control			Nocodazole
Distance (µm)	Mean	SD	Number of centrosomes	Mean	SD	Number of centrosomes
0.5	0.984247	0.015372	98	0.806719	0.184554	86
1	0	0	98	0.001246	0.004949	86
1.5	0.002257	0.003541	98	0.012838	0.023095	86
2	0.003433	0.005883	98	0.013317	0.023859	86
2.5	0.001845	0.004798	98	0.014716	0.031456	86
3	0.001223	0.002844	98	0.009941	0.015777	86
3.5	0.000797	0.002928	98	0.012818	0.02572	86
4	0.000439	0.00166	98	0.009835	0.031957	86
4.5	0.000796	0.002093	98	0.011513	0.020271	86
5	0.000576	0.002846	98	0.00649	0.012041	86
5.5	0.000336	0.001418	98	0.008425	0.018887	86
6	0.000587	0.002814	98	0.008767	0.018926	86
6.5	0.00019	0.000649	98	0.005464	0.010877	86
7	0.000182	0.000757	98	0.008614	0.016329	86
7.5	0.000217	0.000882	98	0.0055	0.012555	86
8	0.000172	0.000932	98	0.006262	0.020861	86
8.5	0.000188	0.001116	98	0.009361	0.04394	86
9	5.96e-05	0.00034	98	0.005011	0.01067	86
9.5	0.000197	0.001312	98	0.004945	0.015918	86
10	0.000361	0.002085	98	0.00213	0.006306	86
10.5	0.000227	0.0016	98	0.004719	0.009951	86
11	0.00012	0.000838	98	0.004498	0.012532	86
11.5	0.000414	0.002067	98	0.005926	0.030054	86
12	0.000302	0.001435	98	0.003348	0.012983	86
12.5	0.000105	0.000857	98	0.001671	0.005584	86
13	1.15e-05	0.000113	98	0.001552	0.004246	86
13.5	0.000106	0.000761	98	0.001319	0.005215	86
14	6.68e-05	0.000392	98	0.002504	0.007578	86
14.5	3.71e-05	0.000294	98	0.000785	0.002859	86
15	0	0	98	0.001513	0.005804	86
15.5	0.000174	0.001252	98	0.000495	0.003126	86
16	3.96e-05	0.000392	98	0.000111	0.000568	86
16.5	8.07e-05	0.000798	98	0.000674	0.003208	86
17	3.3e-05	0.000327	98	0.000201	0.001251	86
17.5	0.000112	0.000921	98	0.001558	0.009705	86
18	0	0	98	0.000738	0.006143	86
18.5	2.97e-05	0.000294	98	0.000143	0.000942	86
19	0	0	98	0.001959	0.017339	86
19.5	3.97e-05	0.000393	98	0.000125	0.000948	86
20	0	0	98	0.00225	0.011228	86

## Sheet: Protein intensity
PCNT intensities (a.u.)	Control	Nocodazole
	13459923	3872690
	22710395	9858520
	22413036	5925758
	18330004	18443777
	28070287	6431878
	23760949	2121771
	20748491	7397783
	24008921	3303990
	11317317	3790242
	10672027	5126876
	14838898	3430462
	22710619	5281748
	14555473	5533211
	16096008	4166116
	20320082	3154535
	10649187	1184502
	19986545	12450148
	17588534	5900701
	20033385	1107450
	18436327	1201528
	17557733	1030013
	17044325	2876584
	22862922	1712166
	26316092	1513850
	22978357	2857465
	9925066	3376455
	20284096	2916727
	17713575	4891185
	26168082	1764270
	15517512	1676894
	14389054	3509138
	17989591	1566685
	10145207	2394282
	14759602	1770712
	10940736	1457110
	14301231	8986366
	32959020	2971216
	12622684	595030
	22058455	7449471
	11101025	4789691
	24585144	3649135
	37472360	4346553
	19003434	1562811
	24465056
	16184245
	17085368
	14499839
	23994113
	16747086
