# Supplementary material for: Co-translational protein targeting facilitates centrosomal recruitment of PCNT during centrosome maturation in vertebrates
Source: eLife journal article supplement (doi:10.7554/elife.34959), 2018-04-30
Supplement: supp [file elife-34959-supp-v1.zip › elife_poa_e34959_Figure_4_source_data_1.xlsx]

## Sheet: FIgure 4A
	Control			Emetine			Harringtonine			Puromycin
Distance (µm)	Mean	SD	Number of centrosomes	Mean	SD	Number of centrosomes	Mean	SD	Number of centrosomes	Mean	SD	Number of centrosomes
0.5	0.04	0.0750432	96	0.06	0.0632836	90	0.01	0.0109971	114	0.01	0.00911056	102
1	0.23	0.0987252	96	0.28	0.152427	90	0.04	0.068472	114	0.04	0.0282858	102
1.5	0.07	0.0386943	96	0.05	0.0488915	90	0.02	0.0256983	114	0.06	0.0372001	102
2	0.03	0.0301611	96	0.02	0.0255756	90	0.02	0.0195431	114	0.06	0.0364816	102
2.5	0.02	0.0233596	96	0.01	0.01655	90	0.04	0.025761	114	0.06	0.0323811	102
3	0.02	0.0259901	96	0.02	0.0226899	90	0.04	0.0288099	114	0.06	0.0313595	102
3.5	0.03	0.0226036	96	0.02	0.0240677	90	0.04	0.0322208	114	0.06	0.0283257	102
4	0.03	0.0231904	96	0.03	0.0291277	90	0.05	0.0308952	114	0.05	0.0335829	102
4.5	0.03	0.0326024	96	0.04	0.0242428	90	0.06	0.0431233	114	0.05	0.0398727	102
5	0.03	0.0221114	96	0.03	0.0214725	90	0.06	0.0380795	114	0.05	0.0320119	102
5.5	0.04	0.033847	96	0.04	0.0264729	90	0.06	0.0324384	114	0.06	0.0268275	102
6	0.04	0.0305215	96	0.04	0.0290734	90	0.06	0.034048	114	0.06	0.0307166	102
6.5	0.05	0.0306945	96	0.04	0.0333535	90	0.06	0.0333268	114	0.04	0.0286031	102
7	0.04	0.0331936	96	0.05	0.0310939	90	0.06	0.0348093	114	0.05	0.0343286	102
7.5	0.04	0.0319823	96	0.05	0.0344461	90	0.06	0.0406177	114	0.05	0.0435546	102
8	0.04	0.0275795	96	0.03	0.0246999	90	0.05	0.0290199	114	0.04	0.027085	102
8.5	0.03	0.0279178	96	0.03	0.02862	90	0.05	0.0338123	114	0.03	0.0230691	102
9	0.03	0.0233128	96	0.03	0.0253659	90	0.03	0.0252847	114	0.03	0.0209221	102
9.5	0.02	0.0235822	96	0.02	0.0183386	90	0.04	0.0318297	114	0.03	0.0277358	102
10	0.02	0.0225608	96	0.01	0.0147145	90	0.03	0.028215	114	0.02	0.0249264	102
10.5	0.02	0.0162323	96	0.02	0.0280444	90	0.02	0.0206542	114	0.02	0.0195461	102
11	0.01	0.0149576	96	0.01	0.0155515	90	0.01	0.0182149	114	0.02	0.0223217	102
11.5	0.01	0.0111055	96	0.01	0.0157845	90	0.01	0.0243033	114	0.01	0.0172378	102
12	0.01	0.0139668	96	0.01	0.0188056	90	0.01	0.015887	114	0.01	0.0197449	102
12.5	0.01	0.0149105	96	0	0.00823866	90	0.01	0.016424	114	0.01	0.0105452	102
13	0.01	0.0119543	96	0.01	0.0115114	90	0	0.00900611	114	0.01	0.0140372	102
13.5	0	0.00905929	96	0	0.00790809	90	0.01	0.0129506	114	0.01	0.00943033	102
14	0	0.00769034	96	0	0.0145376	90	0.01	0.0124813	114	0	0.0110625	102
14.5	0.01	0.0132171	96	0	0.00470912	90	0	0.00697385	114	0.01	0.00940713	102
15	0	0.00848528	96	0	0.00601771	90	0	0.0111192	114	0.01	0.0117759	102
15.5	0	0.00947239	96	0	0.00514336	90	0	0.00543953	114	0	0.0102852	102
16	0	0.00700355	96	0	0.00412835	90	0	0.0149854	114	0	0.00575477	102
16.5	0	0.00668599	96	0	0.00182297	90	0	0.0036355	114	0	0.00742606	102
17	0	0.00374409	96	0	0.00539204	90	0	0.00801803	114	0	0.00419952	102
17.5	0	0.00606852	96	0	0.00884235	90	0	0.0039956	114	0	0.00567997	102
18	0	0.00367336	96	0	0	90	0	0.00313654	114	0	0.00155147	102
18.5	0	0.00479473	96	0	0.0014871	90	0	0.00533524	114	0	0.000813695	102
19	0	0.00810459	96	0	0.00474213	90	0	0.00532825	114	0	0.00267101	102
19.5	0	0.00227206	96	0	0	90	0	0.00467768	114	0	0.00398047	102
20	0	0.00297736	96	0	0.00395193	90	0	0.00991764	114	0	0.00284065	102

## Sheet: Figure 4D
	Control			Ciliobrevin D
Distance (µm)	Mean	SD	Number of centrosomes	Mean	SD	Number of centrosomes
0.5	0.0749979	0.0833817	126	0.00305545	0.0186666	140
1	0.234248	0.120447	126	0.0195306	0.0262321	140
1.5	0.054991	0.0451659	126	0.0328151	0.0348091	140
2	0.0343072	0.0368667	126	0.0288319	0.0292369	140
2.5	0.0284115	0.0240495	126	0.0507692	0.0407061	140
3	0.0420535	0.031207	126	0.0570824	0.0372487	140
3.5	0.0470128	0.0347334	126	0.0719437	0.0454356	140
4	0.0424056	0.0379323	126	0.0831052	0.0561224	140
4.5	0.0449785	0.0392274	126	0.0866012	0.0523921	140
5	0.0537078	0.0479265	126	0.0933108	0.0552234	140
5.5	0.054042	0.0417695	126	0.0841196	0.0528448	140
6	0.0455869	0.0449114	126	0.0818717	0.0530774	140
6.5	0.043434	0.0347392	126	0.0709244	0.04911	140
7	0.0314657	0.0277614	126	0.0550726	0.0376239	140
7.5	0.0333846	0.0308894	126	0.0496661	0.0316885	140
8	0.022462	0.0282511	126	0.0263774	0.0297106	140
8.5	0.0216516	0.0267388	126	0.0274693	0.0298026	140
9	0.0205625	0.0264306	126	0.0147204	0.0258343	140
9.5	0.0182053	0.0305694	126	0.0118562	0.0271326	140
10	0.00954862	0.0200647	126	0.00857294	0.0198316	140
10.5	0.00842738	0.0152133	126	0.00645362	0.0127552	140
11	0.00693339	0.0131044	126	0.00660225	0.0147526	140
11.5	0.00724478	0.0142831	126	0.00279633	0.00838093	140
12	0.00326716	0.00896286	126	0.0038447	0.0110346	140
12.5	0.00103889	0.00479122	126	0.0043977	0.0119407	140
13	0.00230569	0.0074091	126	0.00260049	0.00884478	140
13.5	0.00303304	0.00934089	126	0.00352089	0.0106021	140
14	0.00136119	0.004742	126	0.00189146	0.0086277	140
14.5	0.00374854	0.00878351	126	0.00112027	0.00458561	140
15	0.000393824	0.00329497	126	0.00185946	0.00683305	140
15.5	0.000364739	0.00222941	126	0.00308826	0.0146624	140
16	0.000350637	0.00253673	126	0	0	140
16.5	0.000545912	0.00277532	126	0.00122151	0.00584579	140
17	0.0018321	0.00888936	126	0.000365308	0.00289954	140
17.5	0	0	126	0.000942447	0.00483844	140
18	0.000257203	0.00215192	126	0.000386592	0.00217315	140
18.5	0.000653942	0.00442601	126	0	0	140
19	0.000525456	0.00326993	126	0.000774975	0.0043967	140
19.5	0.000165089	0.00138123	126	0	0	140
20	9.38169e-05	0.000784928	126	0.00043753	0.00347279	140
