# Supplementary material for: Co-translational protein targeting facilitates centrosomal recruitment of PCNT during centrosome maturation in vertebrates
Source: eLife journal article supplement (doi:10.7554/elife.34959), 2018-04-30
Supplement: supp [file elife-34959-supp-v1.zip › elife_poa_e34959_Figure_5_source_data_1.xlsx]

## Sheet: Figure 5A
PCNT intensities (a.u.)	Late G2	Early M
	2388332	5260940
	3552690	4991950
	1850502	4868800
	3261030	9001600
	3675700	5497090
	10080130	7141520
	4828340	7344520
	3801600	7892820
	1369120	4000830
	5803920	4675390
	3716280	4810270
	2259139	4792570
	1972898	6310320
	3968000	5423250
	4418570	7309570
	4819300	3827260
	4789430	4153650
	1526557	3926820
	9229700	6047230
	6897950	6622610
	3372780	8444070
	6329460	6514940
	2553900	6471620
	1879259	6872150
	1867965	4418340
	1717740	5703990
	5040720	5980470
	1886372	4441270
	3629560	6458010
	1995376	5148760
	3718450	7370960
	1386388	5489410
	2277800	5132320
	3607680	5706960
	3078433	7737930
	2718620	3599740
	1652528	6001810
	1433624	3565620
	2867000	3565620
	1075138	6383000
	2167117	5703800
	2199671	4238540
	2199524	7078420
	2233605	5024400
	4959720	8005470
	1741678	7141130
	1071110	7821350
	2157437	6725380
	2908550	7947700
	1430572	8094240
	1844402	12919130
	4255070	5816330
	1392174	8141110
	2048539	5693960
	2720731	3530040
	5098490	6089260
	4009340	5670000
	2106942	5670000
	2890830	6056580
	6442630	7454620
	3926490	5494080
	2815677	5304720
	2970940	8697280
	1749750	7395580
	2383187	3875440
	2306450	4279160
	1043787	4588170
	2025136	8308930
	2608778	7763520
	1979523	10215760
	2071526	7322630
	3772750	6517860
	3105150	4932700
	2500280	6759870
	4218330	5956830
	3114520	5805910
	4331800	4528170
	4214780	5192590
	3327660	5162420
	1310316	6139270
	3352336	5028320
	2256700	8049430
	2935700	5174470
	2387990	6092530
	4102010	5914248
	2567415	6088665
	4484553	2352350
	4209616	5713637
	1739075	3826950
	1657200	8335216
	3495539	5504099
	5691405	5256335
	2773634	7347263
	2942505	5802456
	2963859	6086225
	1872726	6512050
	2671163	4696407
	4787737	5779250
	1733055	4811596
	5687590	4857402
	2052170	2968482
	2489372	3640528
	1772802	5690244
	1576601	5195121
	3801768	5449246
	4164128	4349122
	4493158	5068982
	2108322	5210213
	1778595	6528039
	2580091	4283184
	2626297	7315735
	2208281	4700742
	4663487	6280077
	909685	7858438
	2412531	4549834
	3225324	6462676
	3521202	4530012
	888380	4664652
	3064797	5396869
	1514106	5005247
	2326367	4376702
	2355126	4710233
	3726636	4249427
	3098426	4530747
	2391336	3099926
	1772733	4830452
	1174073	6564918
	2150111	4487324
	2599623	3445784
	1910391	3306265
	1258242	4291389
	1733039	2253693
	6688504	2718168
		4328293
		5153139
		4372954
		4994952
		6651246
		6749335
		5225885
		4083205

## Sheet: Figure 5B
PCNT mRNA number	G1	S/early G2	Late G2	Early M
	17.75	23.75	36.25	44
	13	10.6	33	45.33
	8	25	33	57.33
	11	18.5	39.25	41.67
	15	14	46	30
	6	21	23.25	29
	15	10	33.25	34.25
	9	13.25	44.25	33.75
	12.5	16	39.25	35.5
	15	16.5	46.25	31.75
	5	10	39.25	33.5
	9.5	24.75	40.25	42.75
	14	19.75	24	45.75
	15	22	42.75	35.5
	10.5	26.75	38	29
	14	32.5	34	36
	13	31.25	42	40.75
	10	28	62	35.75
	9.5	33.75	55.75	29
	9	34	33	40
	17.5	33.25	42.25	23.25
	7.5	33.75	32.25	28
	12.5	28.75	42.25	28.75
	16	29.75	46.75	33.5
	18.5	34.2	39	41
	15	31.4	32	30.75
	11	36.25	30	26
	11.5	33.5	44	49
	5.5	26	40.67	35
	13.5	36.5	40.67	29
	7	34.4	33	49.5
	6	36.75	26.5	30.75
	12.5	30	48.5	29
	12.5	38	46	26.75
	6	33	37.5	41
	8	32.25	35.5	43
	8.5	39.5	36.5	24.25
	17	29	29	26.5
	18.5	23.25	61.5	29.25
	3	38.5	27	37.25
	8	27	30.5	39
	8.5	23	54.5	24.75
	13	47.83	46.5	63.75
	10.5	15	32	28.5
	6	17	36.5	32
	10.5	14	36.5	36
	6	14	46.5	15.75
	17.5	20	43.5	60
	9	28.25	45	33
	12	20.33	20	38.75
	14.5	15.25	33	32.75
	7	16	36.5	34.25
	8	21.5	26	43.25
	6.5	17.75	42	43.5
	9.5	33	34	34
	5.5	43	32	45.25
	8	29	33	29.75
	9	37	32	32.5
	11	26	35.5	41
	12.5	29.75	37.5	30.5
	9	36	45	37.25
	3	35.25	32.5	37.25
	8	32.75	44.5	77.25
	8	31	33.5	54.75
	7	34.25	31.5	36
	12	31	46.5	28.25
	11	32	44.5	41.67
	15	12	43	25.33
	11	17	34.5	49
	10	27.5	41	54
	8	23	25.5	52.5
	6	35	30	41.5
	8	21	28.5	40.75
	9	26	33.5	26.5
	7	35	41.5	30
	10	36	41	27.25
	4	35.75	36.5	37.25
	3	46.75	27.5	26.5
	8	20	39	37.5
	7	25.5	34.5	34
	11	24.25	33	42.5
	13	33.75	44	48.25
	10	25.5	36.5	36.25
	12	27	42	40.75
	7	25.3333	35.5	24
	11	24.6667	37.5	40.75
	7	50.4	38	42
	0	30.6667	34.5	41
	6	31.5	36.5	31.5
	6	28.25	34	31.25
	13	22.25	45	21
	9	21.25	42.5	30.5
	6	23	31.5	39.5
	9	35	38.5	35.25
	9	27.5	38	47
	15	10	55.5	37.25
	9	25	35.5	27.25
	4	21.25	29.5	40.5
	7	28.25	43.5	51
	16	27	58	33
	7	31.5	59.5	46
	7	26	42	27.75
	9	17.75	32	44.75
	12	21	46.5	28.75
	8	25.75	36	72.75
	10	20.5	51	52.25
	18	29	44.5	39.25
	4	28	21	37.75
	7	24	43.5	28.5
	7	20	65	33.5
	12	18.4	43	43.25
	11	32.25	46	29.75
	7	26.25	26	22.75
	8	28	33	44.25
	9	33.25	36.5	42.25
	6	27.75	31	36.75
	17	29.5	36.5	34
	13	38	61	42.5
	18	27	26	45
	11		62	63.25
	6		44.5	41.25
	10		40.5	27.75
	7		28.5	47.75
	11		22	44.5
	4		54.5	35.5
	5		38	31.25
	12		31.5	27.5
	3		57	41
	10		60	31.5
	8		37	35.75
	9		31	44.75
	8			96
	10			54
	10			43.5
	11			29
	1
	11
	14
	13
	7

## Sheet: Figure 5C
PCNT intensities (a.u.)	Control	Puromycin
	19596889	11382234
	12269140	8053706
	17942777	9883300
	19872152	7032658
	15186432	18426391
	14144365	11515399
	23491235	10204773
	17649867	11438353
	25710251	11526965
	10688537	12130687
	26448801	11054318
	17745565	15056227
	17734360	9526095
	27682775	8805939
	25594815	12964264
	17654241	9663454
	18177195	15208326
	21553308	11567675
	16235810	10500980
	13752208	10029541
	18916984	9677856
	16526844	10546836
	14360207	13416199
	15574244	15624758
	21232860	9078085
	24874576	9490058
	15633696	13951183
	15014788	11959619
	17689948	13381912
	21882887	8305018
	27023851	10151555
	21427872	18049639
	15872580	10865769
	23221259	12269544
	14931925	8584831
	12895011	14415485
	17406991	18458507
	27555088	7322801
	17941833	11761411
	18825400	11093528
	17696901	7913824
	16673325	17551600
	25683177	7394537
	19885376	14163159
	14514247	14530571
	14878624	15474605
	14794506	7895883
	21501075	8748708
	11551234	5402826
	11187201	7071654
	15082292	9304647
	17904625	5911585
	20727799	17041899
	16289329	15038441
	19484522	12327535
	18311264	7181614
	18328534	8660991
	13129211	7867311
	15508721	13705533
	17478769	10101500
	18664115	12785276
	25485599	13165016
	19281138	11715556
	16122930	8208885
	11960704	20902250
	14522624	15917704
	21227716	14620238
	17924671	12918520
	22156304	10100728
	9893706	13591998
	17596812	14445188
	14137544	17555902
	5733583	17632857
	8110781	13971600
	14374463	18216668
	8509628	9524491
	13029504	17686870
	13376014	20309632
	14655963	26307856
	11471183	11229731
	14177602	11415979
	18056192	15195411
	19774567	18234484
	23951813	14045537
	19835426	13954892
	17599272	17500284
	25167888	18283146
	15964386	15723553
	16759862	14394235
	9653418	12120466
	18530139	22322802
	13538356	9656368
	13118910	19973396
	10802785	21729452
	9521259	14134866
	18131293	9355316
	15164192	16482078
	5629952	13298927
	12177812	13129471
	7412942	9571319
	11354350	11640341
	9181377	14582940
	12558395	11450937
	33163685	12572475
	12282567	6197723
	20447887	17719220
	19840660	16165067
	16175142	13470400
	23462983	14905126
	15662012	17689294
	13956545	10917324
	28262700	7625309
	18756909	16693580
	11531449	8310139
	13747376	13254311
	16400561	11296687
	17350255	7573587
	18151039	11027535
	3.14299e+07	11407826
	2.56656e+07	9605208
	2.27639e+07	15183788
	2.1271e+07	8.24972e+06
	1.62369e+07	1.12207e+07
	1.73203e+07	7383474
	1.0695e+07	1.10881e+07
	20945904	1.18029e+07
	1.31545e+07	1.04791e+07
	1.40967e+07	14469924
	1.24357e+07	1.10011e+07
	20726230	1.15063e+07
	2.13075e+07	7.93012e+06
	1.65202e+07	7.81245e+06
	2.50092e+07	10890404
	1.36193e+07	7.45434e+06
	1.42525e+07	1.08041e+07
	1.09326e+07	1.10506e+07
	1.90663e+07	1.23578e+07
	1.89567e+07	9.26425e+06
	1.82062e+07	1.73505e+07
	1.02403e+07	1.59268e+07
	1.49763e+07	1.32638e+07
	1.43639e+07	1.43831e+07
	1.21924e+07	1.64476e+07
	1.3781e+07	22106154
	1.15611e+07	1.08741e+07
	1.45184e+07	14768138
	1.87302e+07	18118226
		1.02596e+07
		1.44294e+07
		1.48417e+07
		1.25687e+07
		1.4691e+07
		7.30213e+06
