# Supplementary material for: Co-translational protein targeting facilitates centrosomal recruitment of PCNT during centrosome maturation in vertebrates
Source: eLife journal article supplement (doi:10.7554/elife.34959), 2018-04-30
Supplement: supp [file elife-34959-supp-v1.zip › elife_poa_e34959_Figure_6_figure_supplement_1_source_data_1.xlsx]

## Sheet: Sheet1
	Control			Puromycin
Distance (µm)	Mean	SD	Number of centrosomes	Mean	SD	Number of centrosomes
0.5	0.0227777	0.040954	34	0.0015864	0.00555388	54
1	0.164199	0.0984679	34	0.0311888	0.0332479	54
1.5	0.0502567	0.0513379	34	0.0435126	0.0359097	54
2	0.038521	0.0397725	34	0.0517963	0.0366739	54
2.5	0.0409011	0.0361907	34	0.0588064	0.0429245	54
3	0.0507845	0.0411933	34	0.0664476	0.0568205	54
3.5	0.0545549	0.0404353	34	0.0677926	0.0462219	54
4	0.0603374	0.0384164	34	0.0922681	0.0718331	54
4.5	0.0644616	0.0515308	34	0.0803068	0.0525784	54
5	0.0536115	0.0320866	34	0.071857	0.0531887	54
5.5	0.0658712	0.0432801	34	0.0829572	0.0537174	54
6	0.060847	0.0387009	34	0.0707766	0.051687	54
6.5	0.0514561	0.0347655	34	0.0553597	0.0457083	54
7	0.0492556	0.0521681	34	0.0503092	0.0588113	54
7.5	0.0414033	0.0333095	34	0.0483162	0.0439518	54
8	0.0307535	0.037371	34	0.0301431	0.0320621	54
8.5	0.0329612	0.0323264	34	0.0268284	0.0255167	54
9	0.0145466	0.020843	34	0.0159137	0.0231279	54
9.5	0.00833763	0.0160956	34	0.0108829	0.0136152	54
10	0.00880065	0.0181913	34	0.00934555	0.0131169	54
10.5	0.00578122	0.0110362	34	0.0132033	0.0329896	54
11	0.00371776	0.0167215	34	0.00599983	0.0150213	54
11.5	0.00584148	0.0227395	34	0.00288967	0.00746708	54
12	0.0051671	0.0125827	34	0.00357297	0.00959511	54
12.5	0.00431802	0.0142324	34	0.00162523	0.00440378	54
13	0.00303477	0.00939224	34	0.00223969	0.00664657	54
13.5	0.00283655	0.00856277	34	0.0026394	0.0115331	54
14	0.000456287	0.00266059	34	0.000565257	0.00231484	54
14.5	0.000340616	0.00198612	34	0.000222116	0.0012221	54
15	0.000941929	0.00322688	34	0.000160012	0.00117584	54
15.5	0.000975266	0.00460292	34	0	0	54
16	0.000484645	0.00209246	34	0.000116886	0.000858933	54
16.5	0	0	34	0.000103764	0.000762503	54
17	0.000427637	0.00174496	34	0	0	54
17.5	0.000506369	0.00255733	34	0.000266725	0.00196002	54
18	0	0	34	0	0	54
18.5	0.000137414	0.000801256	34	0	0	54
19	0.000394698	0.00230147	34	0	0	54
19.5	0	0	34	0	0	54
20	0	0	34	0	0	54
