# Supplementary material for: Co-translational protein targeting facilitates centrosomal recruitment of PCNT during centrosome maturation in vertebrates
Source: eLife journal article supplement (doi:10.7554/elife.34959), 2018-04-30
Supplement: supp [file elife-34959-supp-v1.zip › elife_poa_e34959_Figure_6_source_data_1.xlsx]

## Sheet: Sheet1
	Control			Puromycin
Distance (µm)	Mean	SD	Number of centrosomes	Mean	SD	Number of centrosomes
0.5	0.034958	0.0610374	152	0.00347323	0.00920328	162
1	0.395568	0.15269	152	0.0470456	0.040119	162
1.5	0.0431377	0.0511143	152	0.0600741	0.0415228	162
2	0.0292533	0.0229478	152	0.0815634	0.0406032	162
2.5	0.0349936	0.0233649	152	0.0983312	0.0412671	162
3	0.041829	0.0267488	152	0.0991586	0.0397202	162
3.5	0.0499838	0.0269868	152	0.100575	0.0371566	162
4	0.0537014	0.0343165	152	0.0992746	0.0441691	162
4.5	0.0592882	0.0332319	152	0.092861	0.0366583	162
5	0.0592844	0.0362378	152	0.0824998	0.0402838	162
5.5	0.0498187	0.0295376	152	0.0674409	0.0346882	162
6	0.0477631	0.0292114	152	0.0572032	0.0320562	162
6.5	0.0386682	0.0247871	152	0.0437846	0.0320521	162
7	0.0282795	0.0207413	152	0.032812	0.0225169	162
7.5	0.0173042	0.0186369	152	0.0166171	0.0173268	162
8	0.00858253	0.0112974	152	0.00950577	0.0141928	162
8.5	0.00395061	0.0103599	152	0.00308902	0.00800144	162
9	0.00146155	0.00462322	152	0.00125882	0.00416872	162
9.5	0.00068121	0.00348131	152	0.00166999	0.0051892	162
10	0.00039363	0.00285038	152	0.00095351	0.00381704	162
10.5	0.00054072	0.00269952	152	0.00013543	0.00135948	162
11	9.6935e-05	0.0011951	152	0.00031129	0.00202475	162
11.5	9.9317e-05	0.00103767	152	4.2333e-05	0.00053881	162
12	9.3392e-05	0.00102451	152	8.859e-05	0.00112756	162
12.5	4.2322e-05	0.00052178	152	5.1823e-05	0.0006596	162
13	0.00014485	0.00178579	152	0.00017901	0.00132013	162
13.5	0	0	152	0	0	162
14	0	0	152	0	0	162
14.5	0	0	152	0	0	162
15	0	0	152	0	0	162
15.5	0	0	152	0	0	162
16	8.1358e-05	0.00100305	152	0	0	162
16.5	0	0	152	0	0	162
17	0	0	152	0	0	162
17.5	0	0	152	0	0	162
18	0	0	152	0	0	162
18.5	0	0	152	0	0	162
19	0	0	152	0	0	162
19.5	0	0	152	0	0	162
20	0	0	152	0	0	162
