# Supplementary material for: Co-translational protein targeting facilitates centrosomal recruitment of PCNT during centrosome maturation in vertebrates
Source: eLife journal article supplement (doi:10.7554/elife.34959), 2018-04-30
Supplement: supp [file elife-34959-supp-v1.zip › elife_poa_e34959_Supplementary_File_1.xlsx]

## Sheet: Zebrafish ISH probes
Supplementary File 1
Sequence Name	Sequence
Zebrafish pcnt-001	UCAUGUUGGUGCACUUCACCGACAGAAAUUACAGAUUGUUCUGGCUCUGAUUUUUCACCAUCAGAUGAGACGUUGUUAGGGACAUUUGAAACCUGAAUCAUGACCUCACUGUCAAGCUCAAACCUGGACGUUUCAGAAUUCUCCACCAAGCCAUGUUCCUCUAGACUCAAUUCAAUUAAAGAACUUUCUUGAAGCCCUUCAGAAGCCAAAUAACGCUCCAUCAGAACAUCCUGGAAACCCCCUCCAGAAACGUCAAAACUAUAGUUGUUUCUGACAACACCCACUGCUGCAGGUUCCUCGUUUAACUUCUGUUUGUAGACUUUGUUCCAGAGUUCUUCUCCACCAAAAUCUUUGGAAUGGUUAUGAGGAGAAUCAGAAUAUUGACUUUGGGCUUGGCUU…
Zebrafish pcnt-002	CAGUUUCUCAUUAGCGUGUUCCUGUCUGCGCUCCUUUUCCGCCUGCUCUUGUUUCCUCUGCCUCUCCAUCUGCUCCUCCUUCACUCUCACCGCUCUCAUCUUUUCCUUCAUCGCAUCCAACUCCACUUGUAACUGAGCGGCUCGUCCCCGCUCUGCCUCUAGAGUGCGCCCGACCUCCGUCUUCUGAUUCUGCAGGCCUUCCAGUGCAGCACGGAGCCUCCUGAUCUCCUCCUGCUCCUUGUGCGCCUCCUGCUCGGCCGCCUCAGCUUGCCUGCGUUUCCCUUCCAGCACCUGCCCUUGCAGACGCUCCAGCAUGGCUGCCAGGUCUUCUCCCUGACUCCUCUCGUGUUCAAGCUGUGCCCGGAGGUCCUGGAUGAACUUUCGGUCGUGAGCGCUGGC…
Zebrafish cep152	CUGCUUUGUGAGCGUCUCAGUUCCUCCUGCAGCUCGGAGAUCUUCAGCCGUUUGCUCUUCAAGUGACUCAAGCAUCGCUGCAGCUCAUUCUUCAGCUCGCGCACCACGUCCUCCUUCAAGUUCGAGUCUGAAAUAUGAGGUGUGCUGUGGAUUCGUCCAUUUCUCCACUUGGACUUCUUGAUCCCCAGAUCCAUGUAGGACUCAGACAGCUGGUUCUCCCAGUCUCCGUUAGACUCCAGGGCUCCGCAUUUAAUGGCCGACUCAUACAGAUUGAUCUGCUCUUUCAGUUCGCUCAGUUCAUCCUGCAGGGCUUUGCUGAUGUCUUCACUGAUGGUGCGAGCGGACUGGACCUGCUGGAGCUUCAUCUGUAACUGGCUCAUCUCCUGCACAGAGCCAGUG…
Zebrafish cep192	CCUACAGAUCUUUUGGCUGGAUUUGCAGUGGCAGUUGGUAAACAGCUUGACUUAGGUCGUGGAAUUGCACUCCGUUUGACAUCAGACCUUGGAUUUUUGAACACCUUGCCUGCAAGGACCUGACAUUUUUUGCUUGCUUCUUGCUCUUCCAUAACUGAAAGCUCUUCAUUUUUAUACAUCGUAGUAUUUUUCACAGGAGCCAACUGCUGUUGGACCUGAUUGUUGGAAUUAGCCAAACCAUCAGCCAAAGUGAGGACGUCAAAGCAGGACUGUGAAGAAGAUUCGUCGCUGUCACUACAGGAGACCUCAGCCUUCUUAAGAUAUUUCUCCAUGUCAGGAGCACUAACAUCUCCCACUAAUGUGGUCUUCUGCAGGUCUUCGAAUAAACCAUUUAAUUGU…
Zebrafish cep215	GGUCUUCAGCUCCAUGAUAUUUCUGUAGUUUGGCUUUAUGAAGGGCCUCUCGAGCCUUGGCCAGAGCCUGAUCCUUCUCCUCGAGAUCUCCAGAUAAAUCCUCAAUCUCCUUCUCUUUCUCUUUCAGAAACAGAGUGAGACCCUGGAUGGCUUUGUCUCGUUUCAGAGAGUUCUUCUUCUCUGUAGAGAGCUCGAUCUCUCGCUUCUGGAGCUCAUCAGAAAGAGCCUUCUUCUCCUUCUCCAUUUCAUCUAGCGCAUCUUUGAGCGUCUGACCAUUGUUCUUUGCUUUGUUCAGUUCUUCAGUAAGCUGUCUGGUUUUCUGCUCCAAUCUGCUGAGUUCAUUCUGCCGAUCAACGAUUAUCUGUUUGUCCCUUUCUGCAUUUUCUUUUCCCUGGUCAA…

## Sheet: Human ISH probes
Sequence Name	Sequence
Human PCNT 5' probe	CCAACUUCCACAGAGUCCAGAAGAGCAUCUUCCCUCGCCCCCUGCAGCCUCUGCUGUAACAGGGUUAGGUCUUCUUGGUAAGUUUUCUCAGCAUCCCUUAACUUCUUUUCAAAAUAAAUCCUCAGUUGCUCCAGUUCGGACUCAUGCUGGGUUUUUUCUCGCUGCUUCAGCUGUUCUAAAUCUUCCACACGAGAGGUGCGCGCCAGGAGUUGCUCAUGUAGCUCACUCAAUUCCUGUCUACUGGUCCUGGCAGAAUCAAGCUGGGACCACAAGCGCCUGAUCUCUUCUUGUGAUUGUGCCUUCAGGUCUUCAUAUGAUGCUUGAAGAUUCUCUAACUCCAGCUGUUUUUCUUUCUCGCUCUCUUUGAACUUGAACUCCAAGUCUUCUAAACACCGGCCG…
Human PCNT 3' probe	UCUGCAGUAAAGCCUUCACGUGCUUCGGACGCACUUCCUUCUCCUUCAUGGCUUCCGGCAGCGGCUGAAACCUUCCAGAGAUGGAAGCAGGGGUCACAGGACCAGCAGUUUGAGCCUCAGGGCCUCCUGACCCCGGGCUCAGUCUUGCUCCAAAACCCGAGCCGUCACUUUUCUCACUUCUAUCAGCUUUUCCUUCUAAUCCAGGAGGAGGUGAACUUAAUGUUUCUUGAGAAUCAAAGGAUGUUGUGAUAAAAUCUUCGACAUCUUUCUCCACAGCCGUCCUCUGCACAUGGUGGUCGUCAGCCGGCGGAGACUCGGCCCACUGCAGUGCCAGCGCUGCUGCAGACACGCCUGGGGAACAAAGCAGCCCCGGCCCCUGGGUCUGUGGCAGCGAGGUGU…

## Sheet: Human PCNT 5' smFISH probes
Sequence Name	Sequence	Modification
PT5_1	ggtggtcactgattgtgaac	Quasar 670
PT5_2	tgtggtcactgactgtgaac	Quasar 670
PT5_3	tcactgattgtgaagatccc	Quasar 670
PT5_4	tgttcacactcctttgtgaa	Quasar 670
PT5_5	ggtcagtaatggcaagttca	Quasar 670
PT5_6	cttcagggtctttactatct	Quasar 670
PT5_7	ctttttcagattcccaatct	Quasar 670
PT5_8	ttgatgctttgcagacagtt	Quasar 670
PT5_9	actggttttgtaaatcctcc	Quasar 670
PT5_10	cttgatgatgactctccagg	Quasar 670
PT5_11	aggtcttcacgtaacttctc	Quasar 670
PT5_12	tcaggtcttcatatgatgct	Quasar 670
PT5_13	atctcttcttgtgattgtgc	Quasar 670
PT5_14	tcaattcctgtctactggtc	Quasar 670
PT5_15	aggagttgctcatgtagctc	Quasar 670
PT5_16	aatcttccacacgagaggtg	Quasar 670
PT5_17	ttttctcagcatcccttaac	Quasar 670
PT5_18	aacagggttaggtcttcttg	Quasar 670
PT5_19	acagagtccagaagagcatc	Quasar 670
PT5_20	tcaggctcgagttcatcaac	Quasar 670
PT5_21	ctgtggctttcttctaactc	Quasar 670
PT5_22	tggatgcagaggggagactc	Quasar 670
PT5_23	cagcatctgtctgagacatg	Quasar 670
PT5_24	tcccaatgctgaagtctcta	Quasar 670
PT5_25	aagcgaaagttgcaccttgt	Quasar 670
PT5_26	tttaccttctccaaatcgtc	Quasar 670
PT5_27	ctggtggtcttcaattagat	Quasar 670
PT5_28	gcttagcattatttagttcc	Quasar 670
PT5_29	tgtttcatcagctcagtctt	Quasar 670
PT5_30	tccttcataactttccagtc	Quasar 670
PT5_31	ttctctcagttcaagtagca	Quasar 670
PT5_32	atggtctgtttctcggattc	Quasar 670
PT5_33	tctcgaagctcaaacttgtt	Quasar 670
PT5_34	ctgaagctgcctcatttcag	Quasar 670
PT5_35	aatgcagggcgtcgtctgaa	Quasar 670
PT5_36	cagtcttccttcacgtggag	Quasar 670
PT5_37	tctaaaaacctgctccgggc	Quasar 670
PT5_38	ctcggtgatctctttacgtt	Quasar 670
PT5_39	catcttgttccgcactgaat	Quasar 670
PT5_40	ctctctaaggaggctgtcag	Quasar 670
PT5_41	cgtgttttgtctgcagttcg	Quasar 670
PT5_42	atcaaggctggacagatgtc	Quasar 670
PT5_43	agagaggtaacaggattcca	Quasar 670
PT5_44	cctcacggatggtctgaaat	Quasar 670
PT5_45	ctgctcgtaagagctctagg	Quasar 670
PT5_46	ttccacagttgttcctcaaa	Quasar 670
PT5_47	tcgtttggtgaagagagtcc	Quasar 670
PT5_48	cagtttctccaactcttgag	Quasar 670

## Sheet: Human PCNT 3' smFISH probes
Sequence Name	Sequence	Modification
PT3_1	tatatgaccttcaagctcgt	Quasar 670
PT3_2	ctttcagctcttcaatctca	Quasar 670
PT3_3	gtttctgattctcttgcaga	Quasar 670
PT3_4	tctgctttctccttttgtaa	Quasar 670
PT3_5	tgactgtcgctgacttcgtg	Quasar 670
PT3_6	caaagcagcatcatgggagg	Quasar 670
PT3_7	cttcaacgtcaccaggacag	Quasar 670
PT3_8	ttcttgcttgcagagaggtg	Quasar 670
PT3_9	agacggtgagcactgacatc	Quasar 670
PT3_10	gagctacgagatcgaccttc	Quasar 670
PT3_11	ttttcctgaagctgtttcac	Quasar 670
PT3_12	ggaatacagcaaacggttca	Quasar 670
PT3_13	catccacattctggaaggtc	Quasar 670
PT3_14	cacagagatttggtgtcggc	Quasar 670
PT3_15	tctccaacaggtgtgctgag	Quasar 670
PT3_16	cacaggaatcatcactccag	Quasar 670
PT3_17	tgatatgtcaggctcttctc	Quasar 670
PT3_18	tgtattggcatcacatgtgt	Quasar 670
PT3_19	tctatggcctgatttttgat	Quasar 670
PT3_20	ggttgtattggcatcacacg	Quasar 670
PT3_21	gataacatcagttacacccc	Quasar 670
PT3_22	ctggtatcaaggaatcccaa	Quasar 670
PT3_23	atgggagaatctggcatttc	Quasar 670
PT3_24	gtcctgacattctgattttt	Quasar 670
PT3_25	aggaagacaggtccagcatc	Quasar 670
PT3_26	aatcttcgacatctttctcc	Quasar 670
PT3_27	ccaggaggaggtgaacttaa	Quasar 670
PT3_28	cgtcacttttctcacttcta	Quasar 670
PT3_29	gctcagtcttgctccaaaac	Quasar 670
PT3_30	cacaggaccagcagtttgag	Quasar 670
PT3_31	ctgaaaccttccagagatgg	Quasar 670
PT3_32	atctgcagtaaagccttcac	Quasar 670
PT3_33	gagatgtcctgtatctcgtc	Quasar 670
PT3_34	tcttgcacaacctgcagaag	Quasar 670
PT3_35	tctcctgctctttttcaaag	Quasar 670
PT3_36	cagatctgagccactgagtc	Quasar 670
PT3_37	tttcgagcagggagctgtga	Quasar 670
PT3_38	tcacggatgatcttctccag	Quasar 670
PT3_39	aagatgctccagggactttt	Quasar 670
PT3_40	ctctactttataagccagca	Quasar 670
PT3_41	aagtcaccagcaatgcactt	Quasar 670
PT3_42	ttctcttgctcttcactcag	Quasar 670
PT3_43	aatctcgcactacagtctgc	Quasar 670
PT3_44	ctctcacagaggtcggactt	Quasar 670
PT3_45	atggatctcagctggaggac	Quasar 670
PT3_46	tcagctcgttctccttactg	Quasar 670
PT3_47	cacgctgtgtctccaaagac	Quasar 670
PT3_48	cgtgagtgctcgatacgcag	Quasar 670

## Sheet: Human ASPM smFISH probes
Sequence Name	Sequence	Modification
AM5_1	aaggtcaaactggactgtgc	Quasar 670
AM5_2	atcgggtgtctgggaatatc	Quasar 670
AM5_3	cccaaaagaagagtagcagc	Quasar 670
AM5_4	gagcagtataagctctgaga	Quasar 670
AM5_5	cgtagtctgtttaacctaca	Quasar 670
AM5_6	aaacaaacggcatgctgcac	Quasar 670
AM5_7	gctttaaccattttttcaga	Quasar 670
AM5_8	cgaacaattaaccgcctagc	Quasar 670
AM5_9	tttccataggtgtctatctt	Quasar 670
AM5_10	caggactttctgacgttctc	Quasar 670
AM5_11	gattgtaggacaacagccaa	Quasar 670
AM5_12	agaccaattcgaagccacaa	Quasar 670
AM5_13	gagttctccataagttgtct	Quasar 670
AM5_14	cctgtgacatcactgttatc	Quasar 670
AM5_15	tccaaagtaggcgattcaga	Quasar 670
AM5_16	tactcagctgctatatcagg	Quasar 670
AM5_17	tgaccatctctatacaggtg	Quasar 670
AM5_18	cggcatctttacagaagaga	Quasar 670
AM5_19	ggatttctttactagccttg	Quasar 670
AM5_20	caccacttaggaaatctcgt	Quasar 670
AM5_21	caaggtgacgggaaaggtca	Quasar 670
AM5_22	atggttaacaggtaatccca	Quasar 670
AM5_23	acattgcaagtctacggcaa	Quasar 670
AM5_24	tgtgagaagttccatggttc	Quasar 670
AM5_25	tgagtttctttgagaggtcc	Quasar 670
AM5_26	agacgacttattgccggaat	Quasar 670
AM5_27	gtcaacattgtgcatctttt	Quasar 670
AM5_28	cacttaattcaattcctcgt	Quasar 670
AM5_29	cctatccacaatatccttag	Quasar 670
AM5_30	tccaaagcaacctgagagtt	Quasar 670
AM5_31	ccacctgaaaagcaaacgct	Quasar 670
AM5_32	aggcacaaacagcatttacc	Quasar 670
AM5_33	cactgtaaaattctccacct	Quasar 670
AM5_34	aggtaacataacacacggcc	Quasar 670
AM5_35	gcaaggatggtaatggtgga	Quasar 670
AM5_36	tacgctgacatatagcgtca	Quasar 670
AM5_37	gtacattccacagtttgagt	Quasar 670
AM5_38	gctctttgtatagctctgaa	Quasar 670
AM5_39	ctaactgcagacctaaccaa	Quasar 670
AM5_40	atagcaggtattccaccaag	Quasar 670
AM5_41	accttttcatctggaattgt	Quasar 670
AM5_42	acgaagatccaaaagccttg	Quasar 670
AM5_43	tatgagtcgagcagctctta	Quasar 670
AM5_44	ttctcaatctttgttttgct	Quasar 670
AM5_45	gacgagtgctgcattaactc	Quasar 670
AM5_46	tctctgtgctaagactcttc	Quasar 670
AM5_47	ttcttatcctagattgcagg	Quasar 670
AM5_48	gtagcccaaagatatcgttt	Quasar 670

## Sheet: Human CEP192 smFISH probes
Sequence Name	Sequence	Modification
192C5_1	cttgggttccttattattca	Quasar 670
192C5_2	tggaattgccagttgttcaa	Quasar 670
192C5_3	tccttctaggtcttcatata	Quasar 670
192C5_4	aacctttttctggaggttct	Quasar 670
192C5_5	cctgtctaagaccatttgta	Quasar 670
192C5_6	acttgcagtttaagctaccg	Quasar 670
192C5_7	agaagagtgtgagtcgaggg	Quasar 670
192C5_8	tcagactctttgtgagttgt	Quasar 670
192C5_9	ctagtcccaggtagacaaat	Quasar 670
192C5_10	ctatctccagtacctataga	Quasar 670
192C5_11	aacataccatctgtgtacct	Quasar 670
192C5_12	aagtttcacatcaatagccc	Quasar 670
192C5_13	tgttttacagggtcagtcag	Quasar 670
192C5_14	gtaggagtctcagtgtctaa	Quasar 670
192C5_15	ctgtcactaatgggcttcaa	Quasar 670
192C5_16	tgaccaaatggcatcagtga	Quasar 670
192C5_17	atgttcgcctttcacaagtt	Quasar 670
192C5_18	tcgatggactcgtgacattc	Quasar 670
192C5_19	tttgatagaccacactctgt	Quasar 670
192C5_20	ccagtgcaaccgaagtatta	Quasar 670
192C5_21	aattaattgtagctccccag	Quasar 670
192C5_22	cgtgatttcctcaacagact	Quasar 670
192C5_23	aactggcatcatctttatcc	Quasar 670
192C5_24	actctcctaaagacagacgt	Quasar 670
192C5_25	agagcttcagatctttgagc	Quasar 670
192C5_26	cctgggactgttcatttaaa	Quasar 670
192C5_27	attgatccttcacttagctg	Quasar 670
192C5_28	ctactgcttcaacctgaagt	Quasar 670
192C5_29	tcattttcatccacttgtga	Quasar 670
192C5_30	tttatcagccgttaacgtca	Quasar 670
192C5_31	gctcatgaagaaagtgtcct	Quasar 670
192C5_32	tctttgtatctttggggttt	Quasar 670
192C5_33	aatcaccactatctggtagc	Quasar 670
192C5_34	ctgaagcaatggtgctgatc	Quasar 670
192C5_35	aaagtgccttgatcattgca	Quasar 670
192C5_36	gtcttgtctctggttttatt	Quasar 670
192C5_37	gacgcacatgagaatagtcc	Quasar 670
192C5_38	atcaagtgcattggatccat	Quasar 670
192C5_39	agttttccaatgcactttca	Quasar 670
192C5_40	tcccaagtatcagacatact	Quasar 670
192C5_41	gtagtttgttctttgggcaa	Quasar 670
192C5_42	cttaagtccaccggatgaat	Quasar 670
192C5_43	cctcacacttacactagtag	Quasar 670
192C5_44	gactcttgattctcactctc	Quasar 670
192C5_45	ctactgcactgttattctct	Quasar 670
192C5_46	catcgttaccaacatcttgt	Quasar 670
192C5_47	ggagtggaaattgaggtagc	Quasar 670
192C5_48	gggttcctcactgatgaata	Quasar 670

## Sheet: Human CEP215 smFISH probes
Sequence Name	Sequence	Modification
215C5_1	aattcctgttgcattctttc	Quasar 670
215C5_2	gatatgttcagtggggccat	Quasar 670
215C5_3	tgagctcaatgttagttttg	Quasar 670
215C5_4	ttcagactttctacttccac	Quasar 670
215C5_5	ttctttcgagcatcttcttt	Quasar 670
215C5_6	tagttaggagatcttccacc	Quasar 670
215C5_7	ctttccaaacgcaaccgaag	Quasar 670
215C5_8	caatcagtctgtctttctca	Quasar 670
215C5_9	taaagcttctttgctcttca	Quasar 670
215C5_10	ttctcctctttaaggcactg	Quasar 670
215C5_11	atcaggacatgccatctgag	Quasar 670
215C5_12	agctctccagatgacacatt	Quasar 670
215C5_13	atggttaaaccctgaatggc	Quasar 670
215C5_14	gcactgagcttttcaatttc	Quasar 670
215C5_15	ctctctggctttagcaaagg	Quasar 670
215C5_16	ctgaaattcctgggtctgtg	Quasar 670
215C5_17	agcagtctcatagtcttcag	Quasar 670
215C5_18	aaagggcttcctttcctgat	Quasar 670
215C5_19	ttggtgaggttttgtgagcg	Quasar 670
215C5_20	cagtctgtggttctctgtac	Quasar 670
215C5_21	cctgggtgatcttcttaatg	Quasar 670
215C5_22	tctaagatcacggatggtgc	Quasar 670
215C5_23	cttcattgcgtaatttttca	Quasar 670
215C5_24	ctcagaagactcttgtaacg	Quasar 670
215C5_25	gatcacttgctcttgattgt	Quasar 670
215C5_26	tggtactttctgttagatgt	Quasar 670
215C5_27	atttctgaagcaacacgtcc	Quasar 670
215C5_28	ttctgctgtattacttccaa	Quasar 670
215C5_29	ctctgcagccattaaatagc	Quasar 670
215C5_30	agagaagatggttttgctgc	Quasar 670
215C5_31	agatttgaccagatgggtat	Quasar 670
215C5_32	tgatactgtctgattcctgc	Quasar 670
215C5_33	tttaactcagcctgcaggtt	Quasar 670
215C5_34	ttccacttgaaaccgattgt	Quasar 670
215C5_35	ctccttcactagctgtataa	Quasar 670
215C5_36	gaaacccatgcaggagagat	Quasar 670
215C5_37	gtagacgcaagtctatctgg	Quasar 670
215C5_38	attttgatcgtgtcctcgtc	Quasar 670
215C5_39	atctcattactctgctgcaa	Quasar 670
215C5_40	tgtgccttaagtatccattt	Quasar 670
215C5_41	ccccatcacaatctgaaatc	Quasar 670
215C5_42	tgaatgcaccttcttctagg	Quasar 670
215C5_43	aacaaaggggcaagcaggtt	Quasar 670
215C5_44	gtaataatgtggccttctca	Quasar 670
215C5_45	taccactttcagaaggtctg	Quasar 670
215C5_46	ctgtcaagaatagttgtccc	Quasar 670
215C5_47	aggtgttctccagaaacttc	Quasar 670
215C5_48	tgtcttctcagttttaccat	Quasar 670
