# Supplementary material for: Co-translational protein targeting facilitates centrosomal recruitment of PCNT during centrosome maturation in vertebrates
Source: eLife journal article supplement (doi:10.7554/elife.34959), 2018-04-30
Supplement: supp [file elife-34959-supp-v1.zip › elife_poa_e34959_Supplementary_File_2.docx]

| **Target gene** | **Target site (5’ to 3’)**  (PAM: underlined) | **Oligonucleotides for annealing (5’ to 3’)** | |
| --- | --- | --- | --- |
| Zebrafish *pcnt* | CCG**GTCAACAGAAGAGCGCCACC** | TA**GGTGGCGCTCTTCTGTTGAC** | AAAC**GTCAACAGAAGAGCGCCA** |
