# Supplementary figures and images for: Co-translational protein targeting facilitates centrosomal recruitment of PCNT during centrosome maturation in vertebrates
Source: eLife journal article supplement (doi:10.7554/elife.34959), 2018-04-30

Figure 2- figure supplement 2

Zebrafish retina

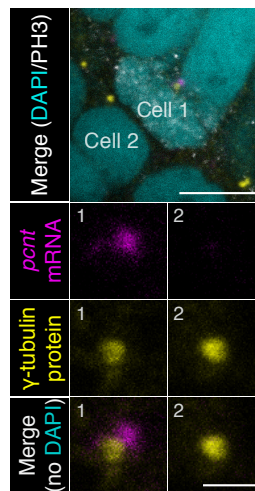

Supplement: supp [file elife-34959-supp-v1.zip]

Figure 3- figure supplement 2

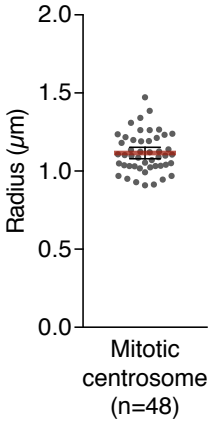

Supplement: supp [file elife-34959-supp-v1.zip]

Figure 1- figure supplement 1

Zebrafish *pcnt* mutant alleles- *pcnt*<sup>tup2</sup> and *pcnt*<sup>tup5</sup>

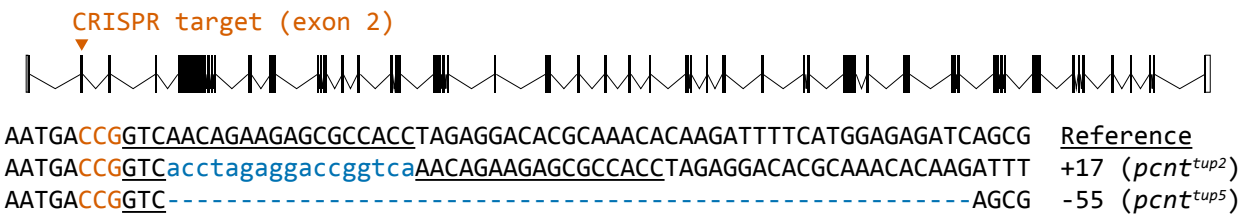

Supplement: supp [file elife-34959-supp-v1.zip]

**Figure 4- figure supplement 3**

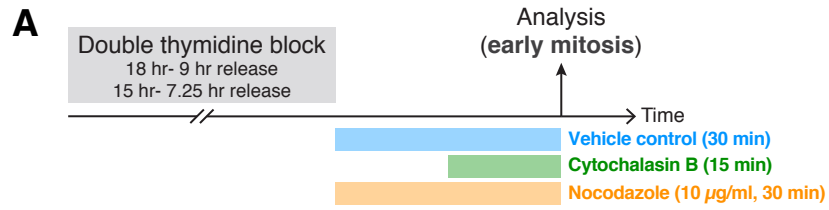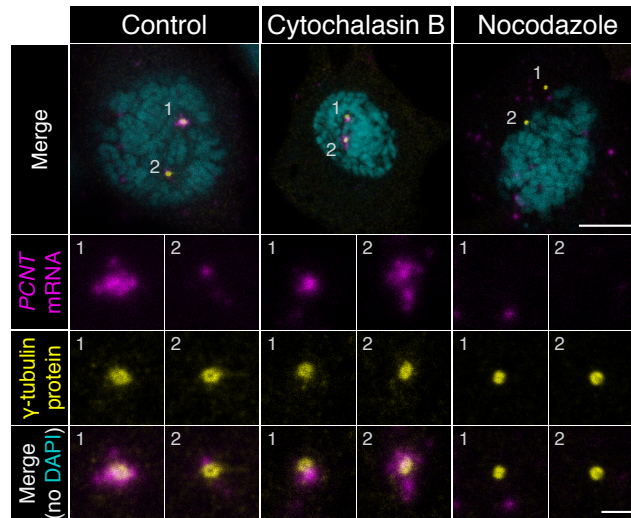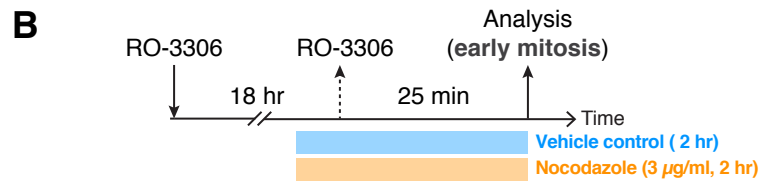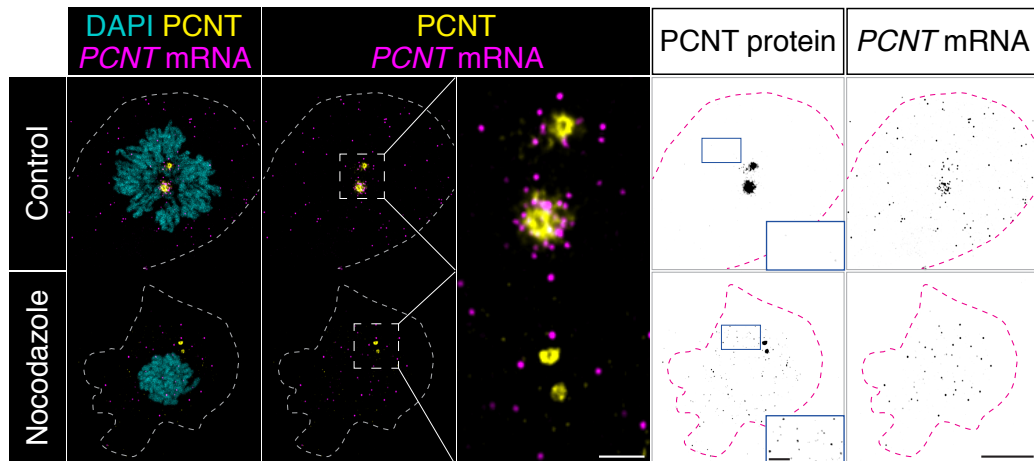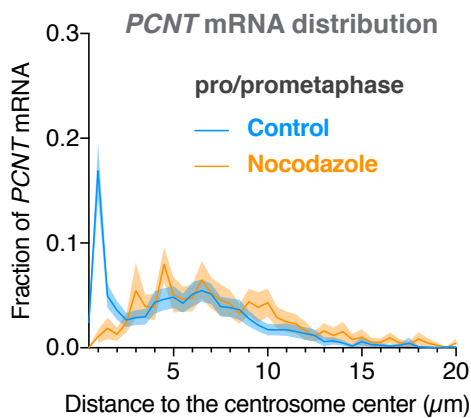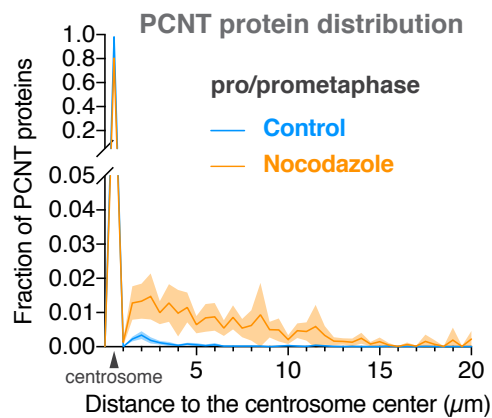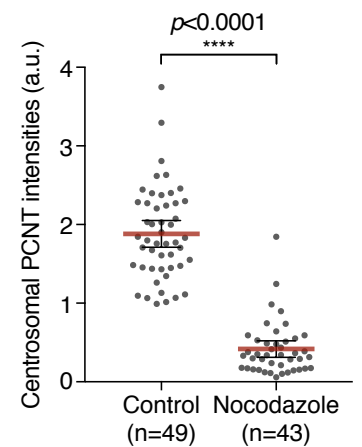

Supplement: supp [file elife-34959-supp-v1.zip]

Figure 3- figure supplement 1

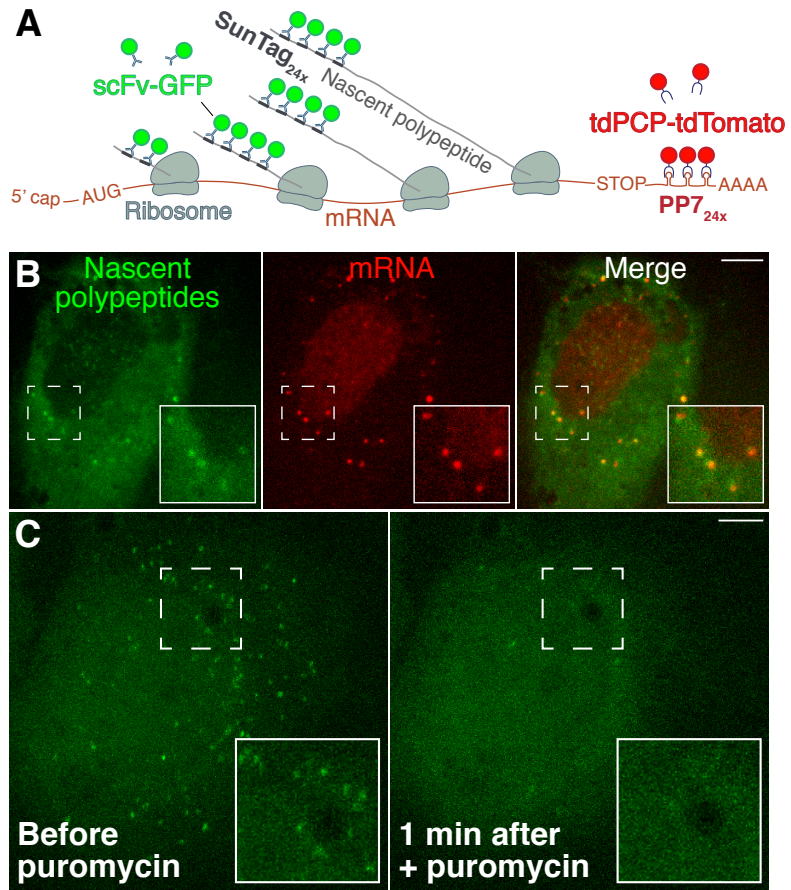

Supplement: supp [file elife-34959-supp-v1.zip]

Figure 2- figure supplement 1

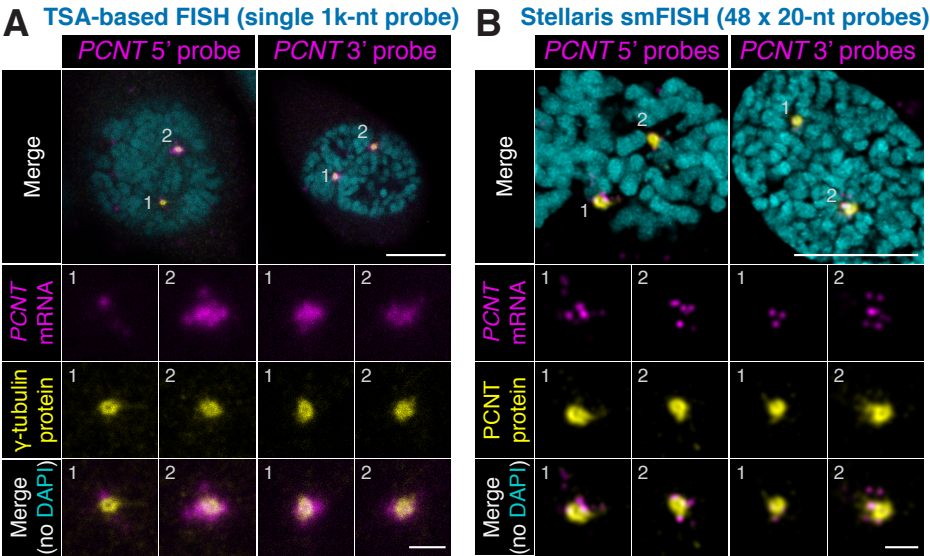

Supplement: supp [file elife-34959-supp-v1.zip]

Figure 3- figure supplement 3

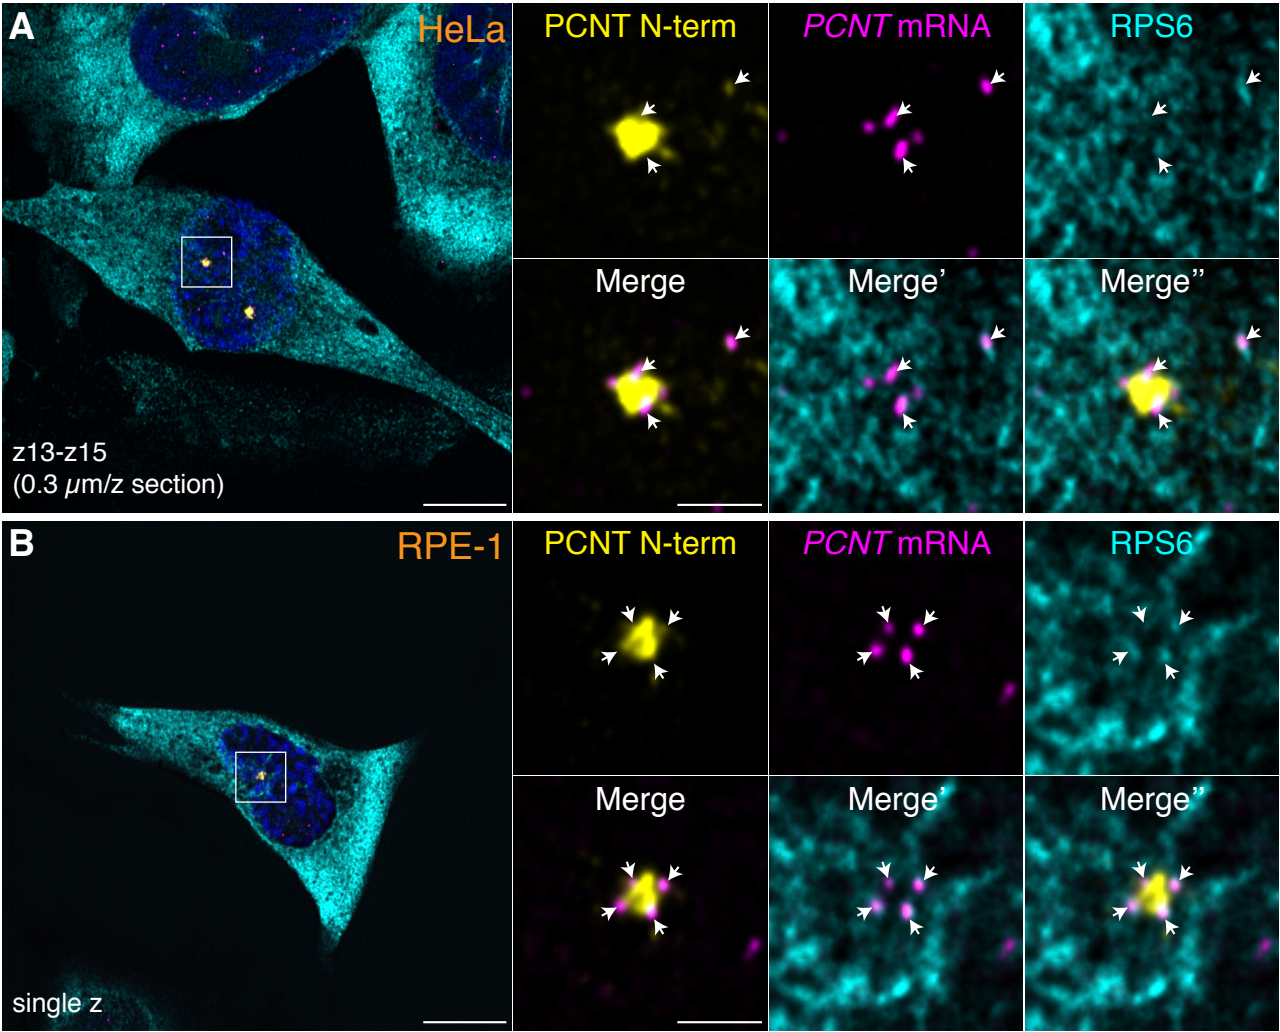

Supplement: supp [file elife-34959-supp-v1.zip]

**Figure 4- figure supplement 1**

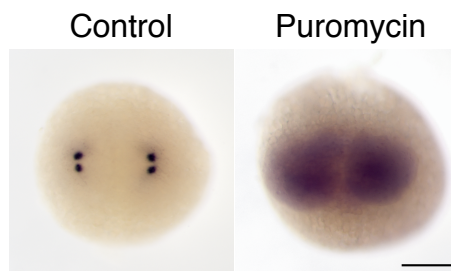

Supplement: supp [file elife-34959-supp-v1.zip]

Figure 4- figure supplement 2

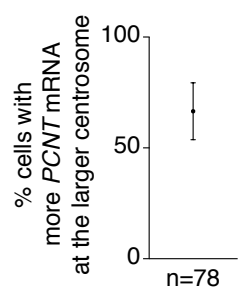

Supplement: supp [file elife-34959-supp-v1.zip]

Figure 6- figure supplement 1

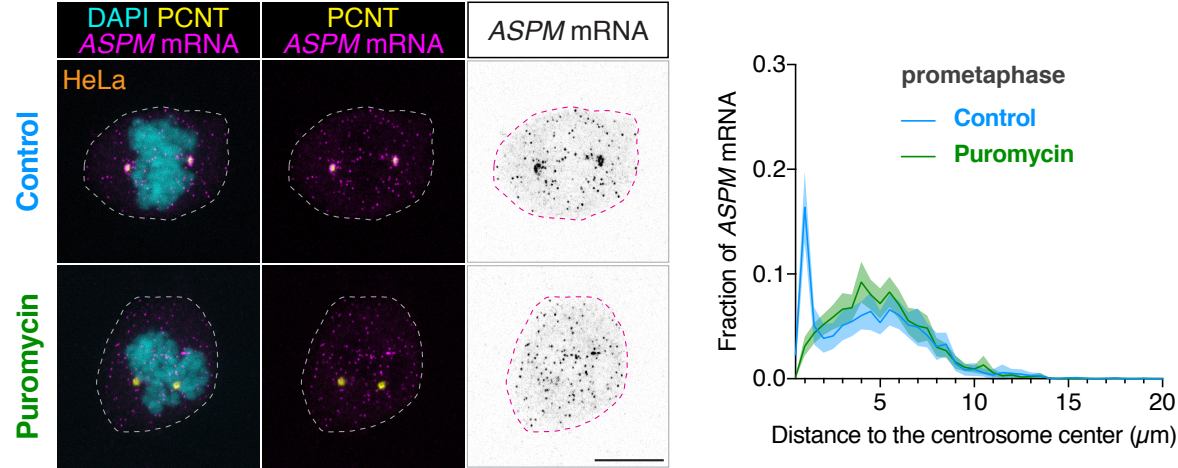

Supplement: supp [file elife-34959-supp-v1.zip]
